# Supplementary material
Source: publisher figshare collection journal article supplement (https://acs.figshare.com/ndownloader/files/4533826)

## Supporting Information (jf-2009-00529w.R1)

**Fig. 1S** Representative immunofluorescence staining of ICAM-1 on the surface of HCAECs. (A) control (without treatment); (B) cells treated with TNF- $\alpha$  only; (C) cells treated with PDTC in presence of TNF- $\alpha$ ; (D–F) cells treated with 30, 100 and 300  $\mu\text{g}/\text{mL}$  PNS in presence of TNF- $\alpha$ , respectively. **1**, ICAM-1 labelling with FITC (green); **2**, nuclear staining with propidium iodide (red); **3**, Merged figure. (Magnification,  $\times 400$ ).

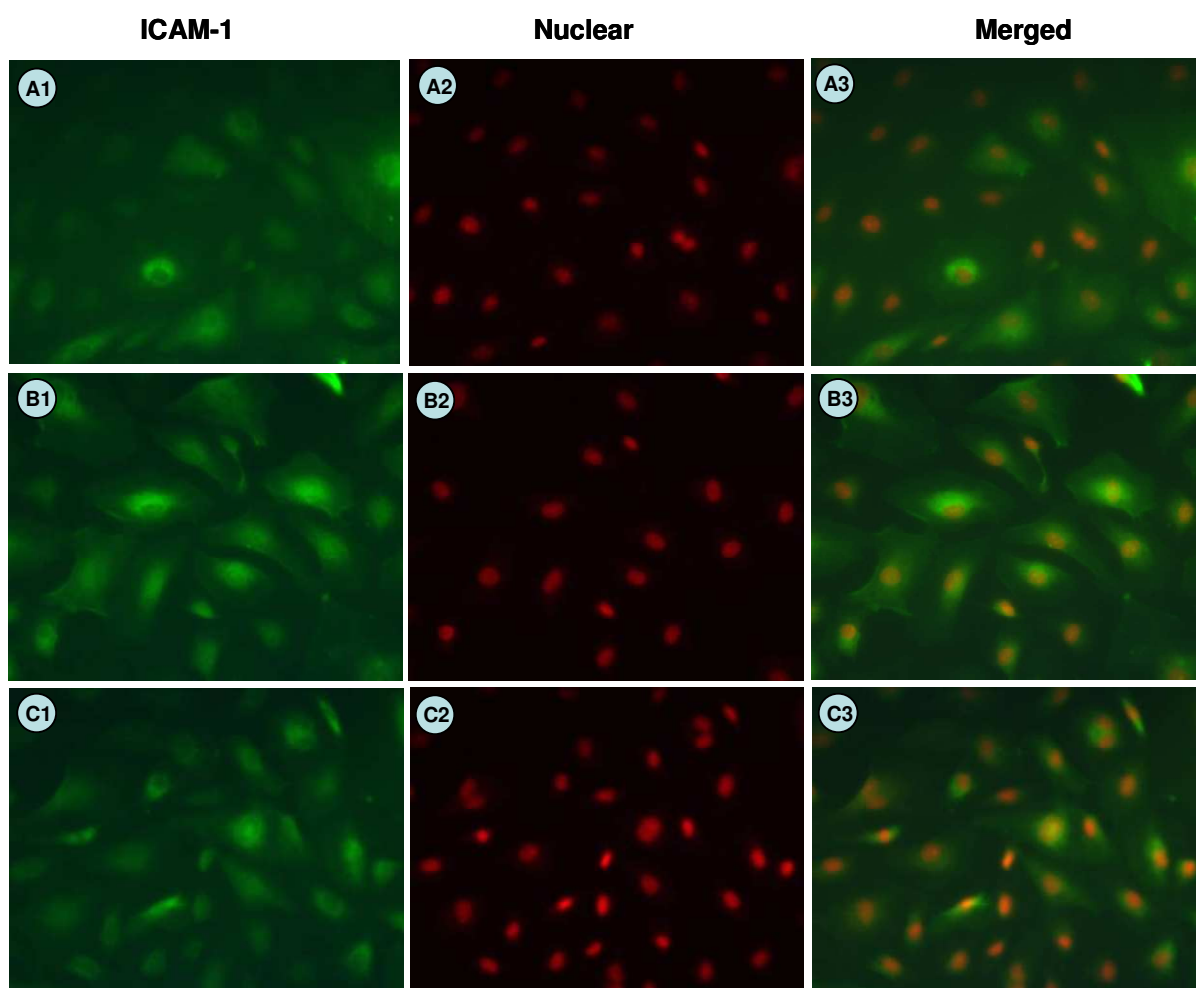

(To be continued)

**Fig. 1S** (Continued)

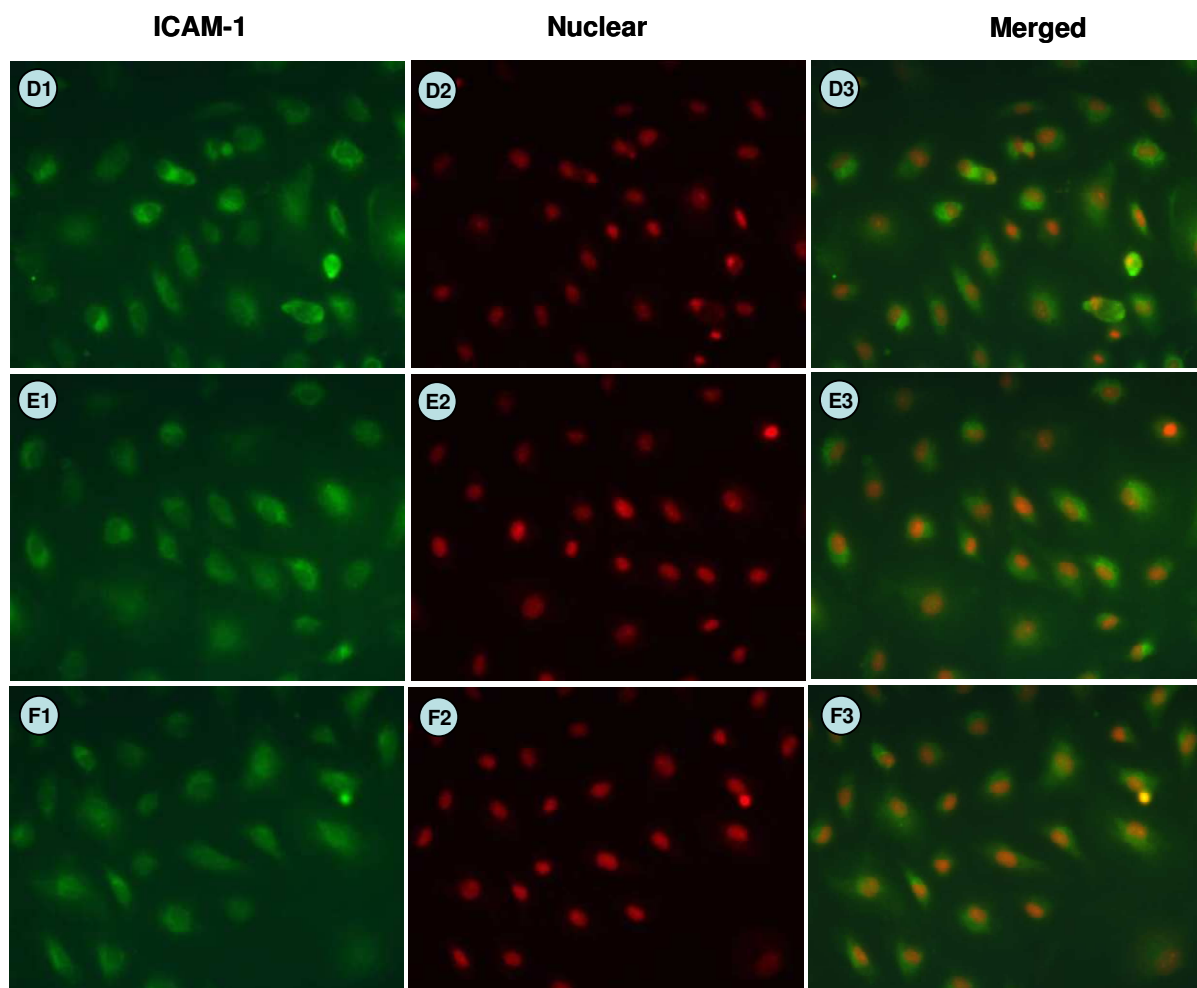

Supplement: Supplementary file 1 [file 4533826]
